# Supplementary material for: Atmospheric pressure and population density as super-factors influencing the transmission of coronavirus disease 2019 (COVID-19)
Source: Research Square preprint supplement (doi:10.21203/rs.3.rs-93707/v3), 2020-12-12
Supplement: Supplementary file 1 [file 2b7cddb697dc0df9cd393601.docx]

**Supplementary Information**

**Atmospheric pressure and population density as super-factors influencing the transmission of coronavirus disease 2019 (COVID-19)**

Wei Yan1*, Muhammad Zohaib Nawaz2#, Wenqian Xu3#, Zheng Jiang1#, Weixiang Sun4, Jiayue Lai1, Yinghui Shao4, Wei Zhang1, Rui Zhang5

1College of Marine Science and Technology, China University of Geosciences, Wuhan 430074, PR China

2Department of Computer Science, University of Agriculture, Faisalabad, 38040 Pakistan

3Department of Statistics, China University of Geosciences, Wuhan 430074, PR China

4School of Computer Science, China University of Geosciences, Wuhan 430074, PR China

5State Key Laboratory of Marine Environmental Science, Fujian Key Laboratory of Marine Carbon Sequestration, College of Ocean and Earth Sciences, Xiamen University, Xiamen 361102, PR China

# These authors contributed equally to this work.

**To whom correspondence should be addressed:**

Assistant Prof. Wei Yan, e-mail: [yanwei@cug.edu.cn](mailto:yanwei@cug.edu.cn)

Wei Yan: A1912, Comprehensive Teaching Building, No. 388 Lumo Road, Wuhan, Hubei, (430074) PR China Tel: 86-027-67886151; Fax: 86-027-67886167

**Figure S1** Average (a) effective reproduction number (*Rproxy*), (b) infection rate (*IR*), and (c) compound growth (*CG*) of coronavirus disease 2019 (COVID-19) and average (d) temperature (*AT*) and (e) atmospheric pressure (*AAP*) at county level for 24 days within the period under investigation. (f) Population density (PD).

**Figure S2** The 24-day average effective reproduction number (*Rproxy*), infection rate (*IR*), and compound growth (*CG*) of coronavirus disease 2019 (COVID-19) plotted as a function of average temperature (*AT*)(a, f, k), average absolute humidity (*AAH*)(b, j, i), average atmospheric pressure (*AAP*)(c, h, m), latitude (d, i, n), and population density (*PD*)(e, j, o) at the county level.

**Table S1** Statistics table for univariate linear and quadratic regression models of compound growth rate (*CG*) of coronavirus disease 2019 (COVID-19) at county level for 17 days within the period under investigation.

**Table S2** Statistics table for univariate linear and quadratic regression models of infection rate (*IR*) of coronavirus disease 2019 (COVID-19) at county level for 17 days within the period under investigation.

**Table S3** Statistics table for univariate linear and quadratic regression models of effective reproduction number (*Rproxy*) of coronavirus disease 2019 (COVID-19) at county level for 24 days within the period under investigation.

**Table S4** 24 Statistics table for univariate linear and quadratic regression models of compound growth rate (*CG*) of coronavirus disease 2019 (COVID-19) at county level for 24 days within the period under investigation.

**Table S5** Statistics table for univariate linear and quadratic regression models of infection rate (*IR*) of coronavirus disease 2019 (COVID-19) at county level for 24 days within the period under investigation.

**Table S6** Statistics table for univariate linear and quadratic regression models of effective reproduction number (*Rproxy*) of coronavirus disease 2019 (COVID-19) at county level for 31 days within the period under investigation.

**Table S7** Statistics table for univariate linear and quadratic regression models of compound growth rate (*CG*) of coronavirus disease 2019 (COVID-19) at county level for 31 days within the period under investigation.

**Table S8** Statistics table for univariate linear and quadratic regression models of infection rate (*IR*) of coronavirus disease 2019 (COVID-19) at county level for 31 days within the period under investigation.

**Table S9** Statistics table for stepwise multiple regression models of average (a) effective reproduction number (*Rproxy*), (b) compound growth (*CG*), and (c) infection rate (*IR*) of coronavirus disease 2019 (COVID-19) at the county level for 24 days within the period under investigation.

**Table S10** Statistics table for stepwise multiple regression models of average (a) effective reproduction number (*Rproxy*), (b) compound growth (*CG*), and (c) infection rate (*IR*) of coronavirus disease 2019 (COVID-19) at the county level for 31 days within the period under investigation.
